# Supplementary material
Source: PubMed Central journal article supplement (PMC10660079)
Supplement: joces-134-254029-s1.pdf [file joces-134-254029-s1.pdf]

**Table S1. Tensins expression in various types of cancer compared with normal tissues analyzed at oncomine.org.**

| Analysis Type by Cancer     | TNS1    |        | TNS2 |         | TNS3    |         | CTEN    |         |
|-----------------------------|---------|--------|------|---------|---------|---------|---------|---------|
|                             | Up      | Down   | Up   | Down    | Up      | Down    | Up      | Down    |
| Bladder Cancer              |         | 3 (1%) |      | 2 (5%)  |         |         |         |         |
| Brain and CNS Cancer        |         |        |      | 3 (1%)  |         |         |         |         |
| Breast Cancer               |         | 6 (1%) |      | 2 (5%)  |         |         | 1 (10%) | 1 (10%) |
| Cervical Cancer             |         |        |      | 1 (1%)  | 1 (1%)  |         |         |         |
| Colorectal Cancer           | 1 (10%) | 4 (1%) |      | 1 (10%) |         |         | 9 (1%)  |         |
| Esophageal Cancer           | 1 (1%)  |        |      |         | 2 (1%)  |         |         |         |
| Gastric Cancer              | 1 (1%)  |        |      |         |         |         | 1 (5%)  |         |
| Head and Neck Cancer        |         | 2 (1%) |      | 1 (5%)  | 2 (5%)  | 1 (5%)  |         |         |
| Kidney Cancer               |         | 3 (5%) |      | 4 (1%)  |         | 1 (1%)  |         | 1 (5%)  |
| Leukemia                    | 1 (10%) | 5 (5%) |      |         | 1 (5%)  | 1 (5%)  |         |         |
| Liver Cancer                |         |        |      | 1 (5%)  |         |         |         |         |
| Lung Cancer                 |         | 9 (1%) |      | 10 (1%) |         | 3 (5%)  | 1 (5%)  |         |
| Lymphoma                    | 9 (1%)  |        |      |         | 10 (1%) |         |         |         |
| Melanoma                    |         | 2 (1%) |      |         |         |         |         | 1 (1%)  |
| Myeloma                     |         |        |      |         | 1 (5%)  |         |         |         |
| Other Cancer                |         | 2 (1%) |      |         | 2 (5%)  | 1 (10%) |         |         |
| Ovarian Cancer              |         | 1 (5%) |      | 2 (5%)  |         |         |         |         |
| Pancreatic Cancer           |         |        |      |         |         |         | 1 (5%)  |         |
| Prostate Cancer             |         | 3 (1%) |      |         |         | 1 (5%)  |         |         |
| Sarcoma                     |         | 7 (1%) |      | 4 (1%)  |         |         |         |         |
| Significant Unique Analyses | 13      | 4      |      | 31      | 19      | 8       | 13      | 3       |
| Total Unique Analyses       | 385     |        | 415  |         | 405     |         | 355     |         |

The data is presented as the number of Oncomine datasets with statistically significant mRNA upregulation (Up) or downregulation (Down) of the target gene. The best gene rank percentile of the target gene appears in parentheses.
